# Supplementary material for: Elemental fractionation during LA-ICP-MS analysis of silicate glasses: implications for matrix-independent standardization
Source: Royal Society of Chemistry journal article supplement (doi:10.1039/b900876d), 2009-01-01
Supplement: b900876d.pdf [file b900876d.pdf]

Table ES11. ESRs for solution nebulization (SN) and laser ablation of SRM 612 and BCR-2G measured using regular cones.

|    | SN   | SRM 612 | BCR-2G |    | SN   | SRM 612 | BCR-2G |
|----|------|---------|--------|----|------|---------|--------|
| Li | 0.32 | 0.54    | 0.67   | In | 4.60 | 3.50    | 4.94   |
| Be | 0.12 | 0.13    |        | Sn | 4.02 | 4.93    | 4.24   |
| B  | 0.21 | 0.26    | 0.14   | Sb | 1.45 | 2.05    | 2.34   |
| Na |      | 2.50    | 1.45   | Te | 0.92 |         |        |
| Mg | 1.00 | 1.00    | 1.00   | Cs | 4.99 | 6.28    | 7.37   |
| Al | 1.47 | 0.64    | 1.28   | Ba | 5.46 | 5.53    | 7.33   |
| Si |      | 0.67    | 0.51   | La | 4.87 | 3.66    | 6.66   |
| P  |      | 0.25    | 0.07   | Ce | 4.98 | 4.94    | 7.00   |
| Ca |      | 2.11    | 3.30   | Pr | 5.59 | 4.52    | 7.25   |
| Sc | 1.95 | 1.48    | 2.61   | Nd | 5.95 | 3.94    | 6.56   |
| Ti | 1.68 |         | 2.11   | Sm | 6.58 | 3.78    | 6.05   |
| V  | 1.95 | 2.72    | 2.99   | Eu | 6.63 | 5.07    | 9.11   |
| Cr | 1.94 | 1.72    | 2.28   | Gd | 6.31 | 4.12    | 8.30   |
| Mn | 2.28 | 1.89    | 2.30   | Tb | 6.77 | 4.27    | 8.56   |
| Fe |      | 2.34    | 1.84   | Dy | 6.35 | 3.71    | 7.34   |
| Co | 2.47 | 2.25    | 2.49   | Ho | 6.19 | 3.65    | 7.22   |
| Ni | 2.03 | 1.81    | 1.83   | Er | 6.14 | 3.72    | 6.91   |
| Cu | 1.60 | 1.68    | 1.19   | Tm | 7.39 | 3.75    | 6.84   |
| Zn | 0.83 | 1.75    | 0.87   | Yb | 7.69 | 4.35    | 10.19  |
| Ga | 2.94 | 2.83    | 3.05   | Lu | 7.37 | 4.23    | 9.89   |
| Ge | 1.62 | 2.98    | 3.13   | Hf | 5.39 | 4.40    | 9.68   |
| As | 0.23 | 0.63    |        | Ta | 4.16 | 3.20    | 7.66   |
| Se | 0.79 | 0.34    |        | W  | 5.03 | 4.19    | 7.04   |
| Rb | 3.62 | 4.60    | 4.66   | Re | 5.60 | 6.05    | 7.91   |
| Sr | 3.93 | 3.47    | 4.54   | Os | 5.85 |         |        |
| Y  | 3.58 | 2.33    | 3.84   | Ir | 5.09 |         |        |
| Zr | 2.57 | 2.37    | 3.65   | Pt | 4.26 | 2.91    | 1.70   |
| Nb | 2.51 | 2.42    | 2.91   | Au | 1.07 | 1.76    |        |
| Mo | 3.07 | 3.25    | 4.60   | Tl | 6.95 | 5.79    | 6.53   |
| Ru | 4.26 |         |        | Pb | 6.49 | 6.62    | 7.74   |
| Rh | 4.03 |         |        | Bi | 5.48 | 5.82    | 6.79   |
| Ag | 3.34 | 2.92    | 4.03   | Th | 7.30 | 4.39    | 11.22  |
| Cd | 2.76 | 2.45    | 4.46   | U  | 7.98 | 7.50    | 11.53  |

Table ESI2. ESRs for SRM 61X glasses measured on the Element 1 in a single analytical session using regular cones.

|    | SRM 616     | SRM 614     | SRM 612     | SRM 610     |    | SRM 616     | SRM 614     | SRM 612     | SRM 610     |
|----|-------------|-------------|-------------|-------------|----|-------------|-------------|-------------|-------------|
| Li | 0.90        | 0.95        | 0.87        | 0.80        | In | 4.72        | 4.29        | 4.29        | 4.63        |
| Be |             |             | <u>0.02</u> | <u>0.02</u> | Sn | 6.51        | 5.97        | 5.60        | 5.80        |
| B  | 1.12        | 0.71        | 0.36        | 0.29        | Sb | 3.74        | 3.33        | 2.91        | 3.51        |
| Mg | 1.17        | 1.12        | 1.07        | 1.45        | Cs | 6.61        | 6.95        | 6.46        | 6.21        |
| Al | 0.99        | 0.92        | 0.97        | 1.03        | Ba | 5.28        | 5.00        | 5.80        | 6.41        |
| Si | <b>1.00</b> | <b>1.00</b> | <b>1.00</b> | <b>1.00</b> | La | 3.74        | 3.39        | 3.97        | 4.21        |
| P  |             |             |             | <u>0.38</u> | Ce | 5.22        | 5.06        | 5.48        | 5.92        |
| Ca | 2.77        | 2.59        | 2.78        | 3.09        | Pr | 5.16        | 4.77        | 5.35        | 6.03        |
| Sc |             |             | 2.17        | 2.36        | Nd | 4.64        | 4.27        | 4.83        | 5.39        |
| Ti |             |             | 3.88        | 3.28        | Sm | 4.32        | 4.24        | 4.83        | 5.39        |
| V  | 3.86        | 3.68        | 3.52        | 3.55        | Eu | 5.38        | 4.96        | 5.54        | 5.65        |
| Cr |             | 2.33        | 2.77        | 2.95        | Gd | 4.02        | 3.98        | 4.58        | 5.40        |
| Mn |             |             | 2.69        | 2.57        | Tb | 4.06        | 3.84        | 4.47        | 4.84        |
| Fe |             | 2.39        | 2.42        | 2.79        | Dy | 3.63        | 3.81        | 4.31        | 5.05        |
| Co |             | 2.26        | 2.86        | 2.86        | Ho | 3.46        | 3.67        | 4.21        | 4.79        |
| Ni |             |             | 2.15        | 2.34        | Er | 3.83        | 3.66        | 4.23        | 5.05        |
| Cu | 6.33        | 3.00        | 2.45        | 2.28        | Tm | 3.99        | 3.77        | 4.35        | 5.27        |
| Zn | <u>3.61</u> | <u>1.83</u> | <u>1.77</u> | <u>1.64</u> | Yb | 3.77        | 3.92        | 4.41        | 4.98        |
| Ga | 2.67        | 3.14        | 3.74        | 3.56        | Lu | 3.97        | 3.73        | 4.24        | 4.90        |
| Ge | 3.19        | 3.79        | 3.54        | 3.12        | Hf | 4.39        | 3.89        | 4.65        | 5.08        |
| As | <u>0.87</u> | <u>0.98</u> | <u>0.78</u> | <u>0.94</u> | Ta | 3.47        | 3.22        | 3.53        | 4.92        |
| Se |             |             | <u>0.59</u> | <u>1.79</u> | W  | 7.80        | 4.84        | 4.86        | 4.94        |
| Rb | 10.24       | 5.54        | 4.95        | 4.70        | Re | 8.96        | 7.30        | 6.80        | 6.47        |
| Sr | 3.69        | 3.45        | 4.00        | 4.18        | Pt | <u>3.80</u> | <u>8.02</u> | <u>3.73</u> | <u>3.64</u> |
| Y  | 2.43        | 2.17        | 2.69        | 3.14        | Au | <u>2.45</u> | <u>1.95</u> | <u>2.20</u> | <u>2.37</u> |
| Zr | 2.46        | 2.30        | 2.76        | 2.99        | Tl | 16.71       | 7.07        | 6.61        | 6.28        |
| Nb | 2.92        | 2.79        | 3.15        | 3.76        | Pb | 8.15        | 7.88        | 7.02        | 6.57        |
| Mo | 5.30        | 4.57        | 3.97        | 4.49        | Bi | 7.28        | 7.67        | 7.28        | 6.37        |
| Ag | 4.81        | 4.41        | 3.94        | 3.76        | Th | 4.77        | 4.18        | 4.84        | 5.33        |
| Cd |             | 3.29        | 3.12        | 3.09        | U  | 8.67        | 9.23        | 8.99        | 8.82        |

Note: Underlined elements have FIP > 9 eV.

**Table ESI3. Laser operating conditions and Si-normalized ESRs for Ca and Al for measurements on SRM 612, MPI-DING, and USGS glasses.**

| Session | Sample     | Ablation mode | UP-213 operating conditions |                         |                   | Elemental Sensitivity Ratio |      |      |      |      |      |
|---------|------------|---------------|-----------------------------|-------------------------|-------------------|-----------------------------|------|------|------|------|------|
|         |            |               | Spot size (µm)              | Laser energy output (%) | Laser energy (mJ) | 1                           |      | 2    |      | 3    |      |
|         |            |               |                             |                         |                   | Al                          | Ca   | Al   | Ca   | Al   | Ca   |
| 1       | SRM 612    | line          | 65                          | 50                      | 0.2               | 1.37                        | 2.81 | 1.34 | 2.79 |      |      |
| 2       | SRM 612    | line          | 100                         | 50                      | 0.4               | 1.46                        | 2.99 | 1.43 | 2.94 | 1.37 | 2.89 |
| 2       | SRM 612    | spot          | 100                         | 70                      | 1.2               | 1.70                        | 3.28 | 1.62 | 3.24 | 1.61 | 3.35 |
| 3       | SRM 612    | line          | 65                          | 60                      | 0.3               | 1.47                        | 2.95 | 1.45 | 2.94 |      |      |
| 4       | SRM 612    | line          | 80                          | 75                      | 0.6               | 0.81                        | 2.03 | 0.83 | 1.96 | 0.83 | 1.97 |
| 1       | ATHO-G     | line          | 65                          | 70                      | 0.8               | 1.96                        | 3.31 | 1.78 | 3.02 |      |      |
| 1       | StHs6/80-G | line          | 65                          | 70                      | 0.8               | 2.02                        | 3.40 | 1.67 | 3.13 |      |      |
| 1       | T1-G       | line          | 65                          | 70                      | 0.8               | 1.86                        | 3.37 | 1.81 | 3.28 |      |      |
| 1       | ML3B-G     | line          | 65                          | 70                      | 0.8               | 1.91                        | 3.16 | 1.82 | 3.23 |      |      |
| 1       | GOR 128-G  | line          | 65                          | 70                      | 0.8               | 1.64                        | 2.97 | 1.58 | 2.81 |      |      |
| 2       | ATHO-G     | spot          | 100                         | 70                      | 1.2               | 1.75                        | 2.94 | 1.66 | 2.85 |      |      |
| 2       | StHs6/80-G | spot          | 100                         | 70                      | 1.2               | 1.76                        | 3.26 | 1.65 | 3.11 |      |      |
| 2       | T1-G       | spot          | 100                         | 70                      | 1.2               | 1.79                        | 3.28 | 1.79 | 3.31 |      |      |
| 2       | BCR-2G     | spot          | 100                         | 60                      | 0.7               | 1.77                        | 3.25 | 1.75 | 3.23 |      |      |
| 2       | ML3B-G     | spot          | 100                         | 70                      | 1.2               | 1.75                        | 3.21 |      |      |      |      |
| 2       | BHVO-2G    | spot          | 100                         | 60                      | 0.7               | 1.76                        | 3.24 | 1.71 | 3.16 | 1.71 | 3.21 |
| 2       | GOR 128-G  | spot          | 100                         | 70                      | 1.2               | 1.58                        | 2.94 | 1.56 | 2.82 |      |      |
| 3       | ML3B-G     | line          | 80                          | 60                      | 0.4               | 2.07                        | 3.73 | 1.93 | 3.56 |      |      |
| 4       | T1-G       | line          | 65                          | 75                      | 0.4               | 1.11                        | 2.17 | 1.05 | 2.09 |      |      |
| 4       | ML3B-G     | line          | 65                          | 75                      | 0.4               | 1.18                        | 2.43 | 1.12 | 2.41 |      |      |
| 4       | KL2-G      | line          | 65                          | 75                      | 0.4               | 1.00                        | 2.23 |      |      |      |      |
| 4       | BHVO-2G    | line          | 80                          | 75                      | 0.6               | 1.11                        | 2.27 | 1.07 | 2.21 | 1.26 | 2.49 |
| 4       | GOR 128-G  | line          | 65                          | 75                      | 0.4               | 1.08                        | 2.23 | 1.07 | 2.14 |      |      |

**Note:** All measurements were performed with an Element 1 at R=4000. For all measurements a Ni-Cu sampler cone and Ni-X skimmer cone were used. Laser repetition rate was 10 Hz for all samples. Travel speed for all lines was 10 µm/s. Spots in Session 2 were ablated for 1 minute.

**Table ESI4. Average ESRs for SRM 612, MPI-DING, and USGS glasses measured with X-cones. Averages and RSDs (1 $\sigma$ ) include geologic glasses only.**

|    | ATHO-G | StHs6/80-G | T1-G | BCR-2G | ML3B-G | BHVO-2G          | GOR128-G         | Ave | RSD | SRM 612 |
|----|--------|------------|------|--------|--------|------------------|------------------|-----|-----|---------|
| Na | 4.2    | 3.8        | 3.6  | 3.4    | 3.4    | 3.7              | 3.6              | 3.7 | 7%  | 3.9     |
| Mg | 1.6    | 1.8        | 2.0  | 1.8    | 1.9    | 1.9              | 1.9              | 1.8 | 6%  | 1.5     |
| Al | 1.8    | 1.8        | 1.8  | 1.8    | 1.8    | 1.7              | 1.6              | 1.8 | 5%  | 1.5     |
| Si | 1.0    | 1.0        | 1.0  | 1.0    | 1.0    | 1.0              | 1.0              | 1.0 |     | 1.0     |
| P  | 0.5    | 0.5        | 0.5  | 0.4    | 0.4    | 0.4              | 0.5              | 0.5 | 8%  | 0.6     |
| Ca | 3.0    | 3.2        | 3.3  | 3.2    | 3.2    | 3.2              | 2.9              | 3.2 | 5%  | 3.0     |
| Sc | 1.4    | 1.5        | 1.5  | 1.8    | 1.6    | 1.6              | 1.6              | 1.6 | 7%  | 1.6     |
| Ti | 2.7    | 2.7        | 2.7  | 2.5    | 2.5    | 2.4              | 2.2              | 2.5 | 8%  | 2.0     |
| V  | 2.8    | 3.2        | 3.1  | 3.6    | 3.3    | 3.7              | 3.2              | 3.3 | 10% | 3.7     |
| Cr | 2.5    | 2.6        | 3.1  | 3.3    | 3.0    | 3.8              | 3.4              | 3.1 | 15% | 3.8     |
| Mn | 3.2    | 3.2        | 3.6  | 3.1    | 3.2    | 3.4 <sup>a</sup> | 3.4              | 3.3 | 5%  | 3.2     |
| Fe | 3.0    | 2.9        | 3.0  | 2.8    | 2.8    | 3.1              | 2.9              | 2.9 | 4%  | 3.2     |
| Co |        | 2.8        | 2.8  | 2.9    | 2.7    | 3.1 <sup>a</sup> | 2.7              | 2.8 | 3%  | 3.0     |
| Ni |        | 2.2        | 2.4  |        | 2.4    | 3.1              | 2.4              | 2.5 | 13% | 2.9     |
| Cu | 2.8    | 2.6        | 2.8  | 2.3    | 2.8    |                  | 2.8              | 2.7 | 8%  | 3.4     |
| Zn | 2.4    | 2.3        | 2.5  | 2.8    | 2.4    | 2.5              | 2.2              | 2.4 | 8%  | 3.3     |
| Ga | 3.9    | 4.4        | 4.4  | 4.6    | 4.3    | 4.7              | 4.8              | 4.4 | 7%  | 5.0     |
| Sr | 3.4    | 3.4        | 3.5  | 3.4    | 3.7    | 3.5              | 3.5              | 3.5 | 3%  | 3.5     |
| Y  | 2.0    | 1.8        | 1.8  | 1.9    | 1.9    | 1.9              | 1.9              | 1.9 | 4%  | 1.9     |
| Zr | 1.7    | 1.6        | 1.4  | 1.8    | 1.7    | 1.8 <sup>a</sup> | 1.7              | 1.6 | 8%  | 1.7     |
| Nb | 2.1    | 1.9        | 1.9  | 2.0    | 2.0    | 1.7              | 2.8 <sup>b</sup> | 1.9 | 6%  | 1.9     |
| Sn | 7.2    | 8.1        | 6.8  | 5.5    | 6.9    |                  | 9.8 <sup>a</sup> | 6.9 | 14% | 6.5     |
| Ba | 3.5    | 3.8        | 3.7  | 3.7    | 3.9    | 4.0              | 3.8              | 3.8 | 4%  | 3.6     |
| La | 2.0    | 2.0        | 1.9  | 2.0    | 2.1    | 2.0              | 1.9              | 2.0 | 3%  | 1.8     |
| Ce | 2.8    | 2.9        | 2.9  | 2.6    | 2.9    | 2.6              | 2.9              | 2.8 | 5%  | 2.7     |
| Pr | 2.9    | 2.8        | 2.9  | 3.0    | 3.1    |                  | 3.0              | 3.0 | 3%  | 2.8     |
| Nd | 2.7    | 2.7        | 2.5  | 2.9    | 2.9    | 2.8              | 3.0              | 2.8 | 6%  | 2.9     |
| Sm | 2.6    | 2.6        | 2.4  | 2.8    | 2.7    | 2.7              | 2.7              | 2.7 | 5%  | 2.6     |
| Eu | 3.2    | 3.3        | 3.0  | 3.6    | 3.3    | 3.3              | 3.3              | 3.3 | 5%  | 3.0     |
| Dy | 2.6    | 2.4        | 2.1  | 2.8    | 2.5    | 2.7              | 2.5              | 2.5 | 9%  | 2.5     |
| Er | 2.4    | 2.2        | 1.9  | 2.5    | 2.3    | 2.5              | 2.2              | 2.3 | 9%  | 2.3     |
| Yb | 2.7    | 2.5        | 2.3  | 3.0    | 2.7    | 2.8              | 2.5              | 2.6 | 8%  | 2.6     |
| Hf | 2.0    | 1.8        | 1.5  | 2.1    | 1.9    |                  | 2.2              | 1.9 | 13% | 2.0     |
| Ta | 1.5    | 1.4        | 1.2  | 1.6    | 1.4    |                  | 1.4 <sup>b</sup> | 1.4 | 10% | 1.3     |
| Pb | 5.1    | 4.8        | 4.7  | 4.6    | 4.1    | 4.9 <sup>a</sup> | 3.2              | 4.4 | 7%  | 5.1     |
| Th | 1.9    | 1.8        | 1.6  | 2.1    | 1.9    | 2.1              | 2.1 <sup>b</sup> | 1.9 | 10% | 1.5     |
| U  | 4.1    | 4.0        | 3.8  | 3.9    | 3.6    | 3.7              | 3.7 <sup>b</sup> | 3.9 | 5%  | 4.2     |

Note: The following ESRs are excluded from the average and RSD: (a) ESRs measured on concentrations with only information values and (b) on concentrations <0.1 ppm. ESRs for elements Co and Ni in ATHO-G are not included because their measured concentrations are more than 35% lower than their reported concentrations (see Table 6 for measured concentrations). Low mass elements (Na to Ga) are measured at R=4000 to avoid interferences. Higher mass elements measured at R=400. Si, used for internal normalization, measured in both.

**Table ES15. Variation in ESRs for ML3B-G measured during different analytical sessions with concentrations provided for comparison.**

|           | ESR         | ESR*        | ESR         | RSD | Conc.<br>(ppm) |
|-----------|-------------|-------------|-------------|-----|----------------|
| <b>Na</b> | 3.35        | 3.54        | 3.30        | 4%  | 17800          |
| <b>Mg</b> | 1.95        | 1.80        | 2.09        | 8%  | 39700          |
| <b>Al</b> | 1.86        | 1.75        | 1.99        | 6%  | 72000          |
| <b>Si</b> | <b>1.00</b> | <b>1.00</b> | <b>1.00</b> |     | 240000         |
| <b>P</b>  | 0.45        | 0.45        | 0.46        | 1%  | 1000           |
| <b>Ca</b> | 3.20        | 3.21        | 3.64        | 8%  | 75000          |
| <b>Sc</b> | 1.57        | 1.65        | 2.20        | 19% | 32             |
| <b>Ti</b> | 2.53        | 2.44        | 2.72        | 6%  | 12800          |
| <b>V</b>  | 3.12        | 3.72        | 3.92        | 12% | 268            |
| <b>Cr</b> | 2.85        | 3.39        | 4.15        | 19% | 177            |
| <b>Mn</b> | 3.27        | 3.19        | 3.66        | 8%  | 1300           |
| <b>Fe</b> | 2.79        | 2.93        | 3.21        | 7%  | 84800          |
| <b>Co</b> | 2.65        | 2.87        | 3.95        | 22% | 41             |
| <b>Ni</b> | 2.37        | 2.51        | 3.34        | 19% | 107            |
| <b>Cu</b> | 2.77        | 3.01        | 3.50        | 12% | 112            |
| <b>Zn</b> | 2.39        | 2.35        | 2.68        | 7%  | 108            |
| <b>Ga</b> | 4.08        | 4.82        | 5.34        | 13% | 20             |

**Note: ESRs used to calibrate SRM 612 concentrations measured during three sessions at R=4000. ESRs with asterisks (\*) were used to calibrate both high and low energy SRM 612 measurements that were run during the same session. RSDs are 1 $\sigma$ .**

Table ES16. Measured concentrations (ppm) for MPI-DING and USGS glasses.

|    | ATHO-G        |       | StHs6/80-G    |       | T1-G          |       | BCR-2G        |       | BHVO-2G       |       | GOR128-G      |       |
|----|---------------|-------|---------------|-------|---------------|-------|---------------|-------|---------------|-------|---------------|-------|
|    | Ave           | Stdev |
| Na | 34000         | 2000  | 36000         | 3000  | 25000         | 200   | 23000         | 300   | 16700         | 700   | 4300          | 200   |
| Mg | 550           | 20    | 11300         | 400   | 23000         | 400   | 21700         | 200   | 46000         | 1000  | 159000        | 2000  |
| Al | 64000         | 3000  | 93000         | 8000  | 89000         | 2000  | 71300         | 500   | 71000         | 1000  | 46000         | 1000  |
| Si | <b>353000</b> |       | <b>298000</b> |       | <b>274000</b> |       | <b>254000</b> |       | <b>233000</b> |       | <b>216000</b> |       |
| P  | 123           | 7     | 720           | 20    | 866           | 8     | 1530          | 20    | 1190          | 10    | 112           | 4     |
| Ca | 11500         | 800   | 38000         | 2000  | 53000         | 1000  | 51000         | 300   | 82000         | 2000  | 40000         | 1000  |
| Sc | 6.2           | 0.4   | 10.5          | 0.6   | 26.1          | 0.6   | 35.26         | 0.02  | 32.9          | 0.8   | 32            | 1     |
| Ti | 1660          | 70    | 4600          | 200   | 4810          | 90    | 13900         | 100   | 16200         | 300   | 1500          | 70    |
| V  | 3.2           | 0.1   | 84            | 4     | 191.8         | 0.2   | 414           | 2     | 316           | 7     | 176           | 2     |
| Cr | 4.9           | 0.2   | 13.9          | 0.9   | 22.9          | 0.1   | 16.72         | 0.02  | 320           | 10    | 2500          | 200   |
| Mn | 810           | 20    | 580           | 20    | 1080          | 20    | 1523.6        | 0.4   | 1390          | 50    | 1450          | 20    |
| Fe | 26800         | 600   | 35000         | 2000  | 53000         | 700   | 94000         | 2000  | 89000         | 4000  | 79000         | 2000  |
| Co | 1.36          | 0.04  | 13.4          | 0.3   | 19.8          | 0.4   | 38            | 1     | 48            | 2     | 90            | 2     |
| Ni | 5.3           | 0.1   | 21.0          | 0.4   | 10.8          | 0.4   | 12.8          | 0.6   | 134           | 5     | 1070          | 20    |
| Cu | 17.9          | 0.5   | 37            | 1     | 19.2          | 0.5   | 15.8          | 0.7   | 125           | 5     | 61            | 2     |
| Zn | 150           | 10    | 66            | 5     | 78            | 4     | 149           | 5     | 108           | 5     | 68            | 2     |
| Ga | 22.2          | 0.4   | 20.6          | 0.8   | 21.0          | 0.1   | 22.0          | 0.3   | 20.9          | 0.6   | 9.3           | 0.3   |
| Sr | 86            | 2     | 450           | 10    | 300           | 20    | 301.0         | 0.6   | 356.5         | 0.4   | 29            | 3     |
| Y  | 96            | 6     | 10.4          | 0.2   | 25            | 3     | 33.3          | 0.9   | 23.97         | 0.04  | 12            | 1     |
| Zr | 510           | 20    | 111           | 6     | 140           | 20    | 174           | 3     | 156           | 2     | 10            | 2     |
| Nb | 66            | 2     | 6.72          | 0.03  | 9.6           | 0.5   | 11.85         | 0.07  | 16.4          | 0.1   | 0.14          | 0.02  |
| Sn | 5.6           | 0.2   | 1.29          | 0.04  | 2.23          | 0.03  | 1.77          | 0.02  | 1.409         | 0.008 | 0.33          | 0.06  |
| Ba | 490           | 20    | 288.6         | 14.0  | 410           | 10    | 584           | 6     | 116           | 4     | 1.0           | 0.1   |
| La | 52            | 2     | 11.3          | 0.3   | 73            | 4     | 21.8          | 0.1   | 13.0          | 0.3   | 0.11          | 0.01  |
| Ce | 117           | 6     | 25.3          | 0.9   | 135           | 8     | 42.828        | 0.007 | 30            | 1     | 0.45          | 0.04  |
| Pr | 14.0          | 0.6   | 2.9           | 0.1   | 13.2          | 0.7   | 5.95          | 0.04  | 4.5           | 0.1   | 0.10          | 0.01  |
| Nd | 58            | 2     | 12.2          | 0.8   | 43            | 3     | 25.6          | 0.3   | 21.1          | 0.7   | 0.8           | 0.1   |
| Sm | 14.1          | 0.5   | 2.7           | 0.1   | 7.1           | 0.6   | 6.2           | 0.1   | 5.6           | 0.3   | 0.53          | 0.07  |
| Eu | 2.63          | 0.09  | 0.93          | 0.05  | 1.3           | 0.1   | 1.86          | 0.03  | 1.82          | 0.04  | 0.26          | 0.04  |
| Dy | 17.1          | 0.6   | 2.12          | 0.09  | 4.8           | 0.6   | 6.2           | 0.2   | 4.96          | 0.05  | 1.9           | 0.2   |
| Er | 10.6          | 0.3   | 1.13          | 0.05  | 2.7           | 0.4   | 3.6           | 0.1   | 2.41          | 0.01  | 1.3           | 0.2   |
| Yb | 10.8          | 0.3   | 1.08          | 0.07  | 2.6           | 0.3   | 3.36          | 0.08  | 1.91          | 0.08  | 1.3           | 0.1   |
| Hf | 14.4          | 0.3   | 2.9           | 0.1   | 3.8           | 0.5   | 4.6           | 0.1   | 4.0           | 0.1   | 0.41          | 0.04  |
| Ta | 4.2           | 0.1   | 0.44          | 0.02  | 0.50          | 0.03  | 0.77          | 0.02  | 1.071         | 0.003 | 0.020         | 0.003 |
| Pb | 7.0           | 0.3   | 12.0          | 0.3   | 15.4          | 0.5   | 10.38         | 0.07  | 1.50          | 0.04  | 0.3           | 0.1   |
| Th | 7.6           | 0.2   | 2.2           | 0.1   | 34            | 3     | 5.4           | 0.2   | 1.10          | 0.01  | 0.009         | 0.002 |
| U  | 2.7           | 0.1   | 1.11          | 0.04  | 2.14          | 0.06  | 1.46          | 0.01  | 0.345         | 0.007 | 0.013         | 0.002 |

Note: For ATHO-G, StHs6/80-G, and GOR128-G, the averages and standard deviations (1 $\sigma$ ) are from 4 measurements over two sessions. T1-G, BCR-2G, and BHVO-2G values are from two measurements during one analytical session.
